# Supplementary material for: An oxygen-deficient Li2ZnTi3O8anode for high-performance lithium storage
Source: Royal Society of Chemistry journal article supplement (doi:10.1039/d2qi00976e), 2022-01-01
Supplement: d2qi00976e1.pdf [file d2qi00976e1.pdf]

## Electronic Supplementary Information

### Oxygen-deficient $\text{Li}_2\text{ZnTi}_3\text{O}_8$ anode for high-performance lithium storage

Huanhuan Liu,<sup>a</sup> Xue Zhang,<sup>a</sup> Zhongxue Zhang,<sup>a</sup> Lijuan Wang,<sup>\*a</sup> Zhaohui Meng<sup>\*b</sup> and

Zhiyuan Tang<sup>c</sup>

<sup>a</sup> College of Petroleum and Chemical Technology, Liaoning Petrochemical University,  
Fushun 113001, Liaoning, China

<sup>b</sup> College of Chemistry and Pharmaceutical Engineering, Nanyang Normal University,  
Nanyang, 473061, Henan, China

<sup>c</sup> Department of Applied Chemistry, School of Chemical Engineering and  
Technology, Tianjin University, Tianjin 300072, China

\*Corresponding authors:

Mrs. Lijuan Wang

E-mail address: [lijuanw123@163.com](mailto:lijuanw123@163.com)

Tel.: +8624-56861711

Mr. Zhaohui Meng

E-mail address: [nysymengzhaohui@126.com](mailto:nysymengzhaohui@126.com)

### Table of Contents

|                                                            |            |
|------------------------------------------------------------|------------|
| <b>I. Experimental.....</b>                                | <b>S2</b>  |
| <b>II. Supplementary Figures 1-12 and Tables 1-11.....</b> | <b>S4</b>  |
| <b>III. References.....</b>                                | <b>S23</b> |

## **I. Experimental**

### **Materials synthesis**

The preparation of the precursors for LZTO is the same as that in our previous work [1]. And then the precursors were calcined for 3 h at 700 °C in flowing N<sub>2</sub>, air and O<sub>2</sub>, with the flowing rates of 2.5, 1000 and 2.5 mL min<sup>-1</sup> for N<sub>2</sub>, air and O<sub>2</sub>, respectively. The obtained samples were marked as LZTO-FN, LZTO-FA and LZTO-FO, respectively.

### **Physical and electrochemical characterizations**

The phases and crystal structures were examined by X-ray diffraction (XRD) on a Bruker D8 Advance X-ray diffractometer (Cu K $\alpha$  radiation,  $\lambda = 1.54 \text{ \AA}$ ) in the  $2\theta$  range of 10-85 °. The morphologies were inspected via a SU8010 scanning electron microscope (SEM). The nanoscale microstructures were observed via a JEM-2100F high-resolution transmission electron microscope (HR-TEM). The surface species were determined by X-ray photoelectron spectra (XPS) on a PHI 5600 CI X-ray photoelectron spectrometer using mono-chromatic Al-K $\alpha$  radiation. The electronic conductivity was obtained from a four-probe system (SB100A/2). A JES-FA200 instrument was used to record the electronic paramagnetic resonance (EPR) spectroscopies of the samples. Raman spectroscopies were performed on a DXR Raman spectrometer with a laser excitation wavelength of 512 nm. The specific surface areas and pore size distributions were measured by a 3H-2000PS2 specific surface area and pore size distribution analyzer via nitrogen adsorption. The surface compositions of the electrode were analyzed using a Fourier transform infrared

spectroscopy (FT-IR) spectrometer (Bruker VERTEX 70).

CR2025 coin-type cells were assembled to test the electrochemical performance. The working electrodes were obtained by pasting the slurry including 85 wt.% active material, 10 wt.% conductive agent, and 5 wt.% binder of polyvinylidene difluoride on a Cu foil. The assembly of the cells was carried out in a glove box filled with high purity Ar. For the half cells,  $\text{Li}_2\text{ZnTi}_3\text{O}_8$  or  $\text{LiNi}_{0.5}\text{Mn}_{1.5}\text{O}_4$  is used as the working electrode and the fresh lithium foil is used as the counter/reference electrode. The loading of the active material is *ca.*  $2.5 \text{ mg cm}^{-2}$ . For the full cells,  $\text{LiNi}_{0.5}\text{Mn}_{1.5}\text{O}_4$  and LZTO-FA were used as the positive electrode and negative electrode, respectively. The loading of LZTO-FA is *ca.*  $1.6 \text{ mg cm}^{-2}$  in the full cells. The specific capacities of the full cells are calculated based on the mass of the anode active material. The electrolyte was 1.2 M  $\text{LiPF}_6$  dissolved into a mixture of ethylene carbonate and ethyl methyl carbonate ( $V/V = 3:7$ ).  $\text{LiNi}_{0.5}\text{Mn}_{1.5}\text{O}_4$  was purchased from Shenzhen Biyuan Electronics Co., Ltd in the work. Charge-discharge and cyclic voltammetry (CV) were tested in 0.02-3.0 V for the LZTO/Li half cells, 3.5-4.95 V for the  $\text{LiNi}_{0.5}\text{Mn}_{1.5}\text{O}_4/\text{Li}$  half cells, and 2-4.55 V for the  $\text{LiNi}_{0.5}\text{Mn}_{1.5}\text{O}_4/\text{LZTO-FA}$  full cells. The scan rates of CV measurements were 0.2-2.0 and  $0.1 \text{ mV s}^{-1}$  for the LZTO/Li half cells and  $\text{LiNi}_{0.5}\text{Mn}_{1.5}\text{O}_4/\text{LZTO-FA}$  full cells, respectively. Electrochemical impedance spectroscopies (EIS) were recorded in 10 mHz-100 kHz with an *ac* voltage of 5 mV.

### **Computation details**

The first-principles calculations were carried out based on the Vienna Ab-initio Simulation Package (VASP) with the projector augmented wave (PAW) method [2-5].

The Perdew-Burke-Ernzerhof (PBE) functional of generalized gradient approximation (GGA) was used to describe the exchange correlation term. All geometrical structures were fully optimized to its ground state with a cutoff energy of 400 eV [6-8]. The energy and forces are converged to  $1 \times 10^{-5}$  eV and  $0.01 \text{ eV \AA}^{-1}$ , respectively. According to the method of reference [9], GGA+U was adopted to underestimate the band gap. The  $\text{Li}^+$  diffusion was using climbing image nudged elastic band (CI-NEB) method [10].

## II. Supplementary Figures 1-12 and Tables 1-11

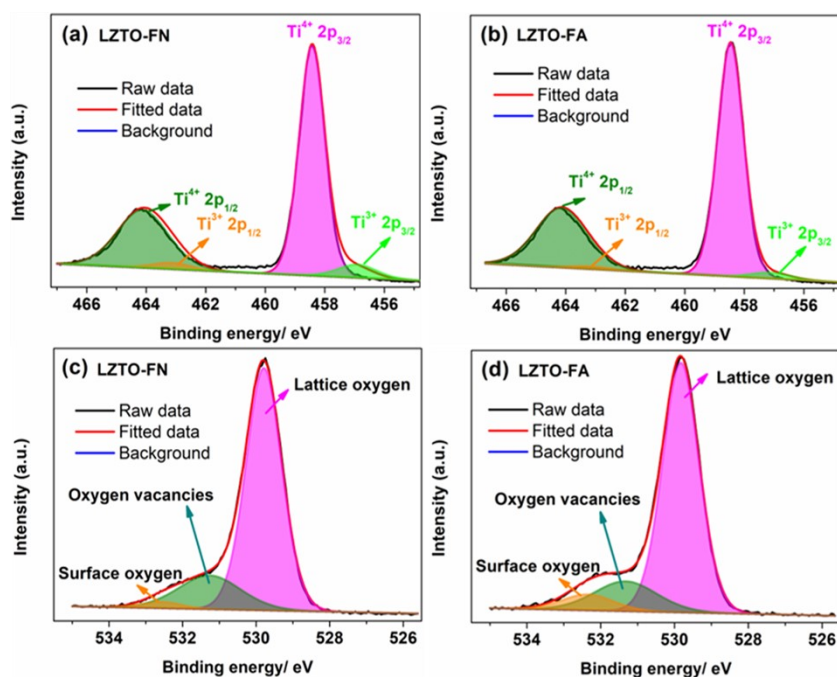

Fig. S1 High-resolution XPS spectra of (a-b) Ti 2p and (c-d) O 1s for LZTO-FN and LZTO-FA.

The high-resolution XPS spectra of Ti 2p and O 1s are shown in Fig. S1 for LZTO-FN and LZTO-FA. The peaks at 464.2 and 458.4 eV correspond to  $\text{Ti } 2p_{1/2}$  and  $\text{Ti } 2p_{3/2}$  [11], respectively. 457.1 and 463.2 eV are assigned to  $\text{Ti}^{3+} 2p_{3/2}$  and  $\text{Ti}^{3+} 2p_{1/2}$  [12], respectively. So, there are  $\text{Ti}^{3+}$  ions on the surfaces of LZTO-FN and LZTO-FA.

Moreover, the content of  $Ti^{3+}$  for LZTO-FN is higher than that of LZTO-FA. The presence of  $Ti^{3+}$  could be associated with the formation of oxygen vacancies after heat treatment [13]. For the O 1s XPS spectra of LZTO-FN and LZTO-FA, peaks at 529.7, 531.1 and 532.6 eV can be ascribed to the lattice oxygen species ( $O_L$ ), oxygen vacancies ( $O_V$ ) and the oxygen absorbed on the surfaces of the materials ( $O_S$ ), respectively [13-15]. The percentage of  $O_V$ s for LZTO-FN is higher than that of LZTO-FA (Table S1).

Table S1 Comparison of XPS results, and electronic conductivity for LZTO-FN and LZTO-FA.

| Samples | XPS (%)   |           | XPS (%) |       |       | $\sigma$ (S $cm^{-1}$ ) |
|---------|-----------|-----------|---------|-------|-------|-------------------------|
|         | $Ti^{4+}$ | $Ti^{3+}$ | $O_L$   | $O_V$ | $O_S$ |                         |
| LZTO-FN | 92.21     | 7.79      | 78.79   | 19.03 | 2.18  | $1.70 \times 10^{-5}$   |
| LZTO-FA | 96.27     | 3.73      | 77.33   | 15.78 | 6.89  | $1.36 \times 10^{-5}$   |

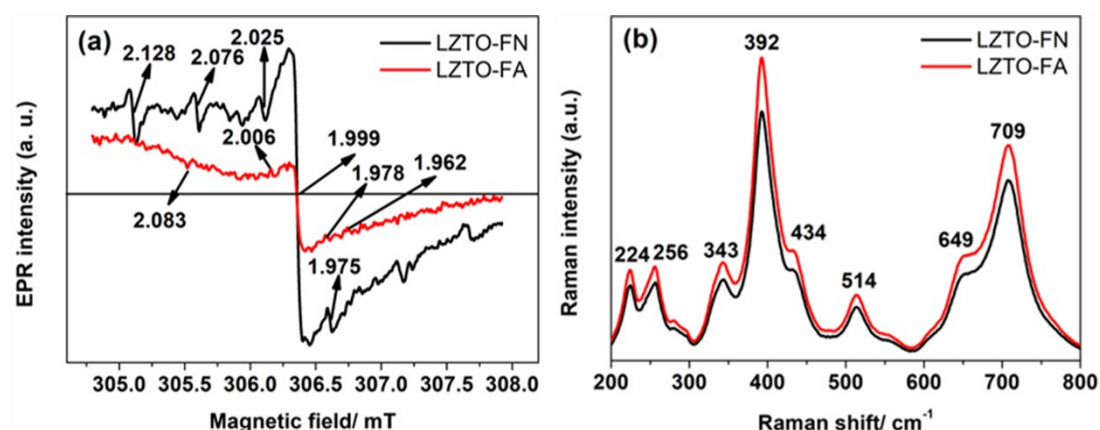

Fig. S2 (a) Electron paramagnetic resonance (EPR) spectra and (b) Raman spectra of LZTO-FN and LZTO-FA.

Electron paramagnetic resonance (EPR) is an effective tool to characterize the paramagnetic species such as  $\text{Ti}^{3+}$ , and defect structures [16]. The  $g$ -value of  $\text{Ti}^{3+}$  is 1.94-1.99 as reported in previous work [17]. The signal *ca.*  $g = 2.0$  is attributed to OVs as reported [18]. So, both  $\text{Ti}^{3+}$  and OVs exist in LZTO-FN and LZTO-FA (Fig. S2a). In addition, the content of  $\text{Ti}^{3+}$  and OVs for LZTO-FN is higher than that of LZTO-FA.

The Raman spectroscopies of LZTO-FN and LZTO-FA are shown in Fig. S2b. The main peaks are at 224, 256, 343, 392, 434, 514, 649, and 709  $\text{cm}^{-1}$  for LZTO. The strongest peak at 392  $\text{cm}^{-1}$  can be assigned to A  $1g$  mode of  $\text{ZnO}_4$  tetrahedra. The band at 434  $\text{cm}^{-1}$  corresponds to the stretching vibrations of the Li-O bonds in  $\text{LiO}_4$  tetrahedra. The high frequency band at 709  $\text{cm}^{-1}$  is assigned to the symmetric stretching vibrations of the Ti-O bonds in  $\text{TiO}_6$  octahedral groups [19]. Compared with LZTO-FA, the band intensities decrease for LZTO-FN, indicating the increase of the  $\text{Ti}^{3+}/\text{Ti}^{4+}$  molar ratio and OVs in LZTO-FN [20].

Table S2 Lattice constants and cell volumes of LZTO-FN and LZTO-FA.

| Samples | $a=b=c$ (Å) | $V$ (Å <sup>3</sup> ) |
|---------|-------------|-----------------------|
| LZTO-FN | 8.364(1)    | 585.14                |
| LZTO-FA | 8.358(4)    | 583.96                |

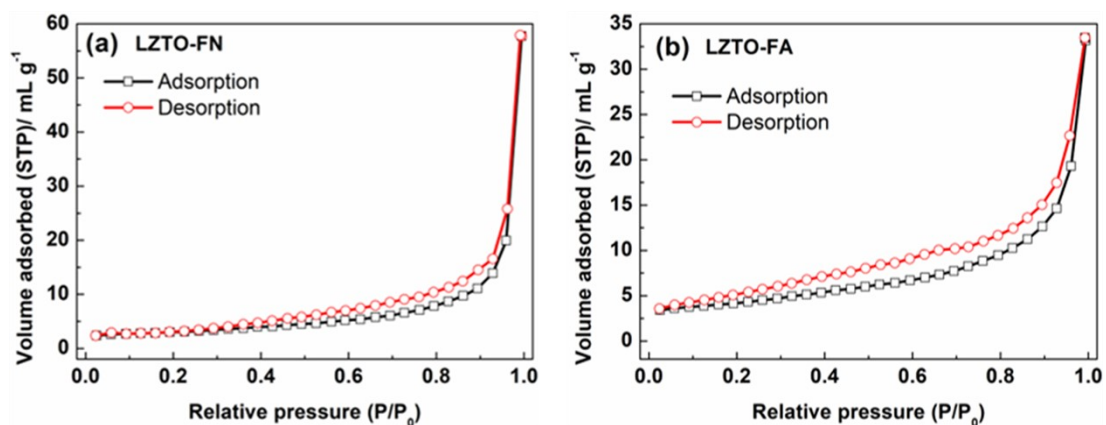

Fig. S3 N<sub>2</sub> adsorption-desorption isotherms of (a) LZTO-FN and (b) LZTO-FA.

Table S3 Specific surface areas, total pore volumes and pore diameters of LZTO-FN and LZTO-FA.

| Samples | Specific surface areas (m <sup>2</sup> g <sup>-1</sup> ) | Total pore volume (mL g <sup>-1</sup> ) | Pore diameters (nm) |
|---------|----------------------------------------------------------|-----------------------------------------|---------------------|
| LZTO-FN | 10.5                                                     | 0.089                                   | 3.06                |
| LZTO-FA | 11.6                                                     | 0.05                                    | 2.64                |

Table S4 Comparison of the CV peak potentials between LZTO-FN and LZTO-FA electrodes at the 1st cycle.

| Samples | $\varphi_{pa}$ (V) | $\varphi_{pc}$ (V) | $\varphi_p$ (V) = $\varphi_{pa} - \varphi_{pc}$ |
|---------|--------------------|--------------------|-------------------------------------------------|
| LZTO-FN | 1.661              | 1.019              | 0.642                                           |
| LZTO-FA | 1.621              | 1.043              | 0.578                                           |

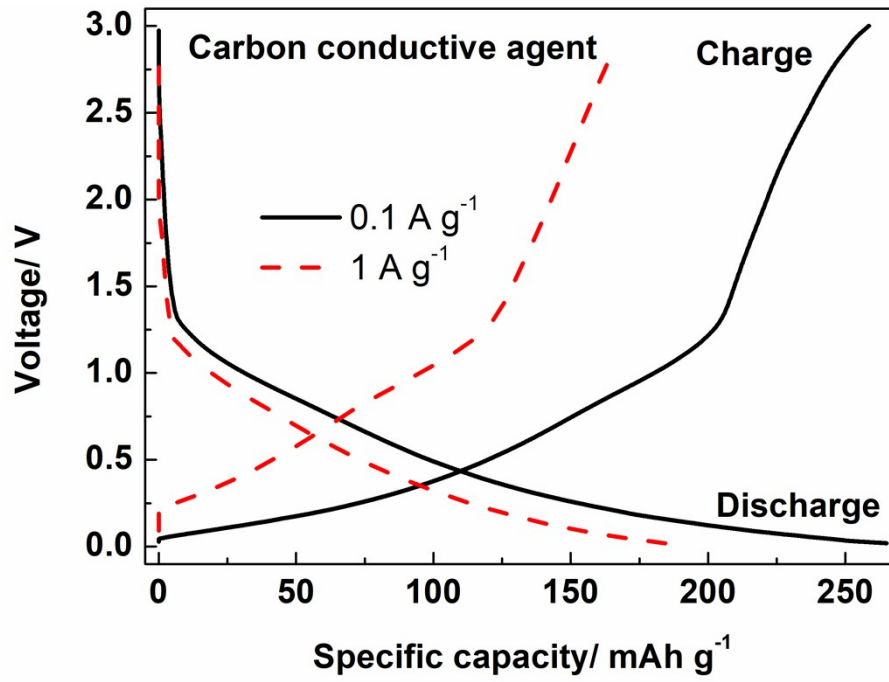

Fig. S4 Charge-discharge curves of the conductive agent at 0.1 and 1 A g<sup>-1</sup>.



Table S5 Cycling performance of LZTO corresponding to the 2nd cycle in recent publications.

| Materials                                                                          | Current densities<br>(A g <sup>-1</sup> ) | Cycle<br>numbers | Capacity<br>retention | References |
|------------------------------------------------------------------------------------|-------------------------------------------|------------------|-----------------------|------------|
| LZTN3O                                                                             | 1                                         | 400              | 68.4%                 | [1]        |
| Li <sub>2</sub> ZnTi <sub>3</sub> O <sub>8</sub> @C                                | 0.229                                     | 100              | 99.2%                 | [21]       |
| Li <sub>2</sub> ZnTi <sub>3</sub> O <sub>8</sub> @C                                | 0.458                                     | 100              | 86.8%                 | [21]       |
| LZTO-0                                                                             | 1                                         | 100              | 91.7%                 | [22]       |
| LZTO-1                                                                             | 1                                         | 100              | 93.3%                 | [22]       |
| LZTO-2                                                                             | 1                                         | 100              | 95.5%                 | [22]       |
| LZTO-3                                                                             | 1                                         | 100              | 93.2%                 | [22]       |
| LZTO                                                                               | 1                                         | 400              | 64%                   | [23]       |
| Li <sub>2</sub> ZnTi <sub>3</sub> O <sub>8</sub> @Li <sub>2</sub> MoO <sub>4</sub> | 1                                         | 400              | 87%                   | [24]       |
| Li <sub>2</sub> ZnTi <sub>3</sub> O <sub>8</sub> @Li <sub>2</sub> MoO <sub>4</sub> | 0.5/2                                     | 400              | 75.7%                 | [24]       |
| LZTO-700-3                                                                         | 1                                         | 200              | 66.9%                 | [25]       |
| LZTO@C-700-1                                                                       | 1                                         | 200              | 60.8%                 | [25]       |
| LZTO@C-700-3                                                                       | 1                                         | 200              | 71.7%                 | [25]       |
| LZTO@C-700-5                                                                       | 1                                         | 200              | 69.7%                 | [25]       |
| LZTO-700-3                                                                         | 2                                         | 200              | 72.3%                 | [25]       |
| LZTO@C-700-1                                                                       | 2                                         | 200              | 67.2%                 | [25]       |
| LZTO@C-700-3                                                                       | 2                                         | 200              | 73.1%                 | [25]       |
| LZTO@C-700-5                                                                       | 2                                         | 200              | 65.7%                 | [25]       |
| LZTO@C-N-1                                                                         | 1                                         | 200              | 71.3%                 | [26]       |
| LZTO@C-N-2                                                                         | 1                                         | 200              | 77.7%                 | [26]       |
| LZTO@C-N-3                                                                         | 1                                         | 200              | 83.0%                 | [26]       |
| LZTO@C-N-3                                                                         | 2                                         | 200              | 75.5%                 | [26]       |
| LZTO                                                                               | 1                                         | 200              | 68.5%                 | [27]       |
| LZTO@C-N-1                                                                         | 1                                         | 200              | 61.8%                 | [27]       |
| LZTO@C-N-2                                                                         | 1                                         | 200              | 68.1%                 | [27]       |
| LZTO@C-N-3                                                                         | 1                                         | 200              | 63.8%                 | [27]       |
| LZTO@C-N-2                                                                         | 2                                         | 200              | 73.7%                 | [27]       |
| LZTO@C-N-2                                                                         | 3                                         | 200              | 75%                   | [27]       |
| LZTO                                                                               | 1                                         | 400              | 75.8%                 | [28]       |
| LZTO/G                                                                             | 1                                         | 400              | 76.4%                 | [28]       |
| LZTO                                                                               | 2                                         | 300              | 63.1%                 | [28]       |
| LZTO/G                                                                             | 2                                         | 300              | 72.3%                 | [28]       |
| LZTO@GNS                                                                           | 1                                         | 400              | 81.6%                 | [29]       |
| LZTO@GNS-CNT                                                                       | 1                                         | 400              | 93.3%                 | [29]       |
| LZTO@GNS                                                                           | 2                                         | 400              | 85.3%                 | [29]       |
| LZTO@GNS-CNT                                                                       | 2                                         | 400              | 92.7%                 | [29]       |
| LZTO                                                                               | 1                                         | 400              | 86.5%                 | [30]       |
| LZTMO@G                                                                            | 1                                         | 400              | 87.2%                 | [30]       |
| LZTO                                                                               | 2                                         | 300              | 57.2%                 | [30]       |
| LZTMO@G                                                                            | 2                                         | 300              | 89.7%                 | [30]       |
| LZTO@C                                                                             | 1                                         | 200              | 70.5%                 | [31]       |
| LZTO@C                                                                             | 2                                         | 200              | 65.7%                 | [31]       |
| LZTO@C@La <sub>2</sub> O <sub>3</sub>                                              | 1                                         | 200              | 89.8%                 | [31]       |

Table S5 (Contd.)

| Materials                             | Current densities<br>(A g <sup>-1</sup> ) | Cycle<br>numbers | Capacity<br>retention | References |
|---------------------------------------|-------------------------------------------|------------------|-----------------------|------------|
| LZTO@C@La <sub>2</sub> O <sub>3</sub> | 2                                         | 200              | 77.2%                 | [31]       |
| LZTO-0                                | 1.5                                       | 400              | 90%                   | [11]       |
| LZTO-1                                | 1.5                                       | 400              | 97.6%                 | [11]       |
| LZTO/NMO                              | 1                                         | 400              | 85.3%                 | [32]       |
| LZTO/C-3                              | 1                                         | 400              | 94.4%                 | [33]       |
| LZTO                                  | 1                                         | 400              | 34.6%                 | [34]       |
| LZTW3O                                | 1                                         | 400              | 93.1%                 | [34]       |
| LM6ZTW3O                              | 1                                         | 400              | 94.7%                 | [34]       |
| LZTO-FN                               | 1                                         | 400              | No decay              | The work   |
| LZTO-FA                               | 2                                         | 400              | No decay              | The work   |

Table S6 Rate capability of LZTO in recent publications.

| Materials                                                                          | Current densities (A g <sup>-1</sup> ) | Specific capacities (mAh g <sup>-1</sup> ) | Cycle numbers | References |
|------------------------------------------------------------------------------------|----------------------------------------|--------------------------------------------|---------------|------------|
| LZTO                                                                               | 2                                      | 78                                         | 25            | [23]       |
| Li <sub>2</sub> ZnTi <sub>3</sub> O <sub>8</sub> @Li <sub>2</sub> MoO <sub>4</sub> | 2                                      | 112                                        | 60            | [24]       |
| Li <sub>2</sub> ZnTi <sub>3</sub> O <sub>8</sub>                                   | 2                                      | 55                                         | 60            | [24]       |
| LZTO-700-3                                                                         | 2.8                                    | 141.9                                      | 60            | [25]       |
| LZTO@C-700-1                                                                       | 2.8                                    | 174.5                                      | 60            | [25]       |
| LZTO@C-700-5                                                                       | 2.8                                    | 173.8                                      | 60            | [25]       |
| Li <sub>2</sub> ZnTi <sub>3</sub> O <sub>8</sub> /TiO <sub>2</sub>                 | 2                                      | 173.4                                      | 50            | [35]       |
| Li <sub>2</sub> ZnTi <sub>3</sub> O <sub>8</sub> /TiO <sub>2</sub>                 | 3                                      | 161.6                                      | 60            | [35]       |
| LZTO                                                                               | 1.145                                  | 47                                         | 106           | [36]       |
| LZTO@RGO10                                                                         | 1.145                                  | 50                                         | 106           | [36]       |
| LZTO@RGO25                                                                         | 1.145                                  | 154                                        | 106           | [36]       |
| LZTO@RGO50                                                                         | 1.145                                  | 113                                        | 106           | [36]       |
| LZTO-2                                                                             | 2.29                                   | 135                                        | 20            | [37]       |
| LZTNO                                                                              | 1.145                                  | 80                                         | 15            | [38]       |
| Li <sub>2</sub> ZnTi <sub>3</sub> O <sub>8</sub> /C                                | 2                                      | 178                                        | 60            | [39]       |
| LZTO/KCl                                                                           | 1.6                                    | 135.6                                      | 50            | [40]       |
| P-LZTO                                                                             | 1.6                                    | 53.3                                       | 40            | [32]       |
| LZTO/NMO                                                                           | 1.6                                    | 161.3                                      | 40            | [32]       |
| LZTO/NMO-1                                                                         | 1.6                                    | 101.8                                      | 40            | [32]       |
| P-LZTO                                                                             | 1.6                                    | 44                                         | 50            | [41]       |
| LZTO/LMS-1                                                                         | 1.6                                    | 107.1                                      | 50            | [41]       |
| LZTO/LMS-2                                                                         | 1.6                                    | 140.4                                      | 50            | [41]       |
| LZTO/LMS-3                                                                         | 1.6                                    | 144.9                                      | 50            | [41]       |
| PZ                                                                                 | 1.6                                    | 69.3                                       | 50            | [42]       |
| FA1                                                                                | 1.6                                    | 124.5                                      | 50            | [42]       |
| FA2                                                                                | 1.6                                    | 144.3                                      | 50            | [42]       |
| FA3                                                                                | 1.6                                    | 96.1                                       | 50            | [42]       |
| FA2-800                                                                            | 1.6                                    | 143.5                                      | 50            | [42]       |
| FA2-850                                                                            | 1.6                                    | 127.6                                      | 50            | [42]       |
| P-LZTO                                                                             | 1.6                                    | 32.4                                       | 50            | [43]       |
| LZTO/LZO                                                                           | 1.6                                    | 109.8                                      | 50            | [43]       |
| LZTO/LZO-1                                                                         | 1.6                                    | 85.3                                       | 50            | [43]       |
| P-LZTO                                                                             | 1.6                                    | 65.8                                       | 50            | [44]       |
| LZTO/C-1                                                                           | 1.6                                    | 55.6                                       | 50            | [44]       |
| LZTO/C-2                                                                           | 1.6                                    | 106.7                                      | 50            | [44]       |
| LZTO/C-3                                                                           | 1.6                                    | 102.5                                      | 50            | [44]       |
| Li <sub>2</sub> ZnTi <sub>2.9</sub> Cr <sub>0.1</sub> O <sub>8</sub>               | 2                                      | 156.7                                      | 50            | [45]       |
| LZTO/C-3                                                                           | 2                                      | 169.8                                      | 40            | [33]       |
| LZTO/C-3                                                                           | 3                                      | 150.9                                      | 50            | [33]       |
| LZTO-E                                                                             | 2                                      | 138                                        | 40            | [46]       |
| LZTO-E                                                                             | 3                                      | 125                                        | 50            | [46]       |
| Li <sub>2</sub> Zn <sub>0.9</sub> Nb <sub>0.1</sub> Ti <sub>3</sub> O <sub>8</sub> | 2                                      | 160                                        | 40            | [47]       |
| Li <sub>2</sub> Zn <sub>0.9</sub> Nb <sub>0.1</sub> Ti <sub>3</sub> O <sub>8</sub> | 3                                      | 147                                        | 50            | [47]       |
| FLZTO-2                                                                            | 1                                      | 179.4                                      | 60            | [48]       |
| NWLZTO-2                                                                           | 1                                      | 132.8                                      | 60            | [49]       |
| LZTO-FA                                                                            | 1.5                                    | 192                                        | 60            | The work   |

Table S6 (Contd.)

| Materials | Current densities (A g <sup>-1</sup> ) | Specific capacities (mAh g <sup>-1</sup> ) | Cycle numbers | References |
|-----------|----------------------------------------|--------------------------------------------|---------------|------------|
| LZTO-FA   | 2                                      | 186.6                                      | 80            | The work   |
| LZTO-FA   | 2.5                                    | 180.7                                      | 100           | The work   |
| LZTO-FA   | 3                                      | 173.2                                      | 120           | The work   |

Table S7 Rate capability of some other anodes with comparable theoretical specific capacity with LZTO in recent publications.

| Materials                                                            | Current densities (A g <sup>-1</sup> /C) | Specific capacities (mAh g <sup>-1</sup> ) | Cycle numbers | References |
|----------------------------------------------------------------------|------------------------------------------|--------------------------------------------|---------------|------------|
| N-doped TiO <sub>2</sub>                                             | 2.5                                      | 150                                        | 80            | [50]       |
| TiO <sub>2</sub> @CNT                                                | 5 C                                      | 122                                        | 40            | [51]       |
| TiO <sub>2</sub>                                                     | 5 C                                      | 116                                        | 50            | [52]       |
| TiO <sub>2</sub> @C                                                  | 5 C                                      | 90                                         | 30            | [53]       |
| TiO <sub>2</sub> -carbonized PAN                                     | 1                                        | 74.7                                       | 40            | [54]       |
| TiNb <sub>2</sub> O <sub>7</sub>                                     | 1.6                                      | 145.7                                      | 50            | [55]       |
| TiNb <sub>2</sub> O <sub>7</sub>                                     | 6 C                                      | 183                                        | 35            | [56]       |
| Ti <sub>2</sub> Nb <sub>10</sub> O <sub>29</sub> -CB-CO <sub>2</sub> | 2                                        | 100                                        | 35            | [57]       |
| A-TiNb <sub>2</sub> O <sub>7</sub>                                   | 10 C                                     | 174                                        | 50            | [58]       |
| m-TiNb <sub>2</sub> O <sub>7</sub>                                   | 10 C                                     | 157                                        | 55            | [59]       |
| Ti <sub>2</sub> Nb <sub>10</sub> O <sub>29</sub> /AOSC               | 10 C                                     | 135.2                                      | 50            | [60]       |
| 12% C-Nb <sub>2</sub> O <sub>5</sub>                                 | 10 C                                     | 137                                        | 30            | [61]       |
| M-Nb <sub>2</sub> O <sub>5</sub>                                     | 10 C                                     | 119                                        | 30            | [62]       |
| T-Nb <sub>2</sub> O <sub>5</sub>                                     | 10 C                                     | 117.3                                      | 30            | [63]       |
| A- Nb <sub>2</sub> O <sub>5</sub>                                    | 2                                        | 142                                        | 40            | [64]       |
| T-Nb <sub>2</sub> O <sub>5-x</sub> @NC-7                             | 2                                        | 150                                        | 25            | [65]       |
| 2D Nb <sub>2</sub> O <sub>5</sub> -C-rGO                             | 10 C                                     | 175                                        | 40            | [66]       |
| Nb <sub>2</sub> O <sub>5</sub> @N-C                                  | 10 C                                     | 163                                        | 40            | [67]       |
| Li <sub>3</sub> VO <sub>4</sub>                                      | 2                                        | 110                                        | 25            | [68]       |
| Li <sub>3</sub> VO <sub>4</sub>                                      | 3                                        | 69                                         | 30            | [68]       |
| Li <sub>3</sub> VO <sub>4</sub>                                      | 0.2 C                                    | 168                                        | 10            | [69]       |
| LZTO-FA                                                              | 2 (8.7 C)                                | 186.6                                      | 80            | The work   |
| LZTO-FA                                                              | 2.5 (10.9 C)                             | 180.7                                      | 100           | The work   |
| LZTO-FA                                                              | 3 (13.1 C)                               | 173.2                                      | 120           | The work   |

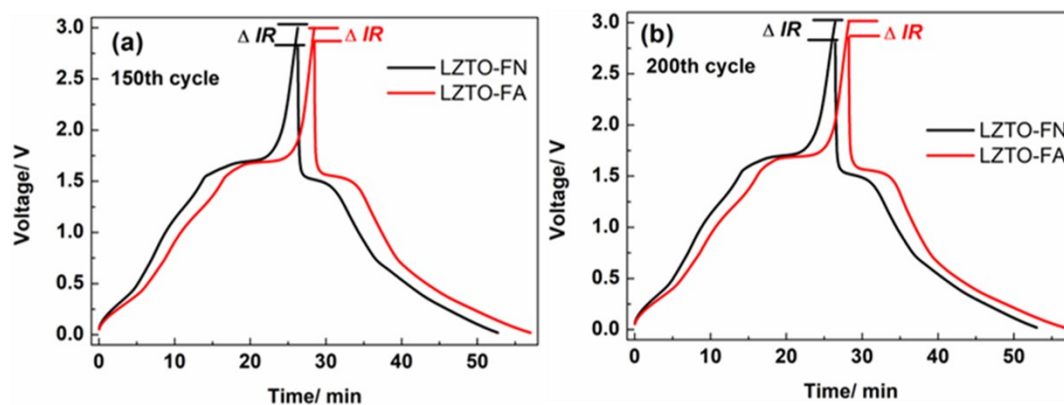

Fig. S5 *IR*-drop data of LZTO-FN and LZTO-FA electrodes at  $0.5 \text{ A g}^{-1}$  when charging is switched to discharging for the (a) 150th cycle and (b) 200th cycle.

The magnitude of internal resistance can be characterized by the voltage drop, or *IR* drop, when charging/discharging is switched to discharging/charging (Fig. S5). Compared with LZTO-FN, LZTO-FA has smaller *IR* drop during the cycling process.

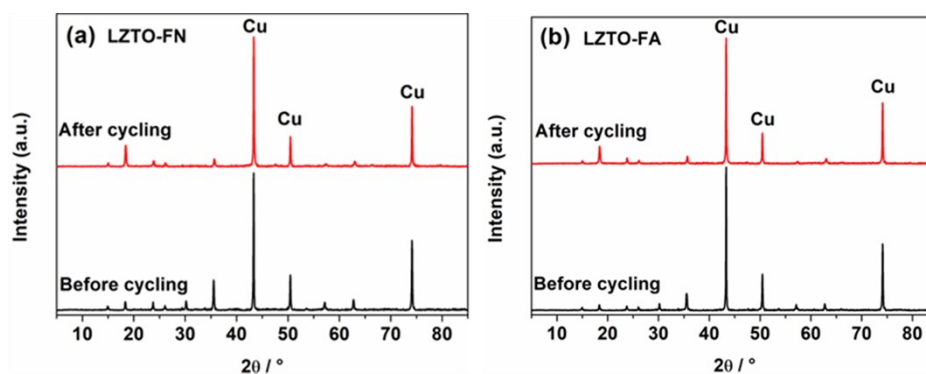

Fig. S6 Ex-situ XRD patterns of the LZTO-FN and LZTO-FA electrodes before and after cycling for 100 cycles at  $1.5 \text{ A g}^{-1}$  ( $55 \text{ }^\circ\text{C}$ ).

Table S8 Cell volumes of LZTO-FN and LZTO-FA electrodes before and after cycling at  $1.5 \text{ A g}^{-1}$  for 100 cycles ( $55 \text{ }^\circ\text{C}$ ).

| Samples | Cell volumes ( $\text{\AA}^3$ ) |               |
|---------|---------------------------------|---------------|
|         | Before cycling                  | After cycling |
| LZTO-FN | 586.6                           | 585.0(8)      |
| LZTO-FA | 586.8(4)                        | 587.3(8)      |

Fig. S6 presents the XRD patterns of the LZTO-FN and LZTO-FA electrodes before and after cycling for 100 cycles at  $1.5 \text{ A g}^{-1}$  ( $55 \text{ }^\circ\text{C}$ ). It can be seen that some of the diffraction peaks of the LZTO-FN and LZTO-FA electrodes are blurry after cycling. The cell volume change ratios are 0.259% and 0.092% for LZTO-FN and LZTO-FA, respectively (Table S8), indicating that the structure of the LZTO-FA electrode with proper amount of OVs retains significantly stability during insertion and de-insertion of  $\text{Li}^+$  ions. However, the structure of the LZTO-FN with excess OVs is partly changed during cycling process.

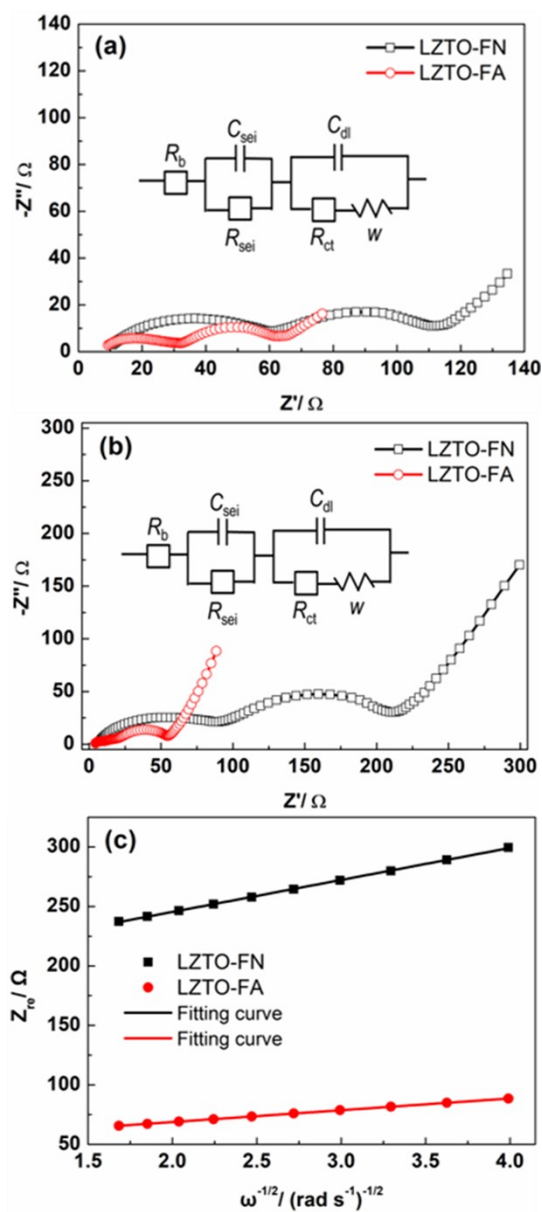

Fig. S7 Impedance spectra of the LZTO-FN and LZTO-FA electrodes (a) after cycling for 400 cycles at  $2 \text{ A g}^{-1}$ , and (b) after cycling at different current densities in Fig. 5d and corresponding equivalent circuits (inset). (c) Relationship between  $Z_{re}$  and  $\omega^{-1/2}$ .

Table S9 Impedance parameters calculated from equivalent circuit models, and lithium diffusion coefficients ( $D_{\text{Li}^+}$ ) of LZTO-FN and LZTO-FA.

| Samples | After 400 cycles   |                               |                              | After 120 cycles   |                               |                              | $D_{\text{Li}^+}$ (cm <sup>2</sup> s <sup>-1</sup> ) |
|---------|--------------------|-------------------------------|------------------------------|--------------------|-------------------------------|------------------------------|------------------------------------------------------|
|         | $R_b$ ( $\Omega$ ) | $R_{\text{sei}}$ ( $\Omega$ ) | $R_{\text{ct}}$ ( $\Omega$ ) | $R_b$ ( $\Omega$ ) | $R_{\text{sei}}$ ( $\Omega$ ) | $R_{\text{ct}}$ ( $\Omega$ ) |                                                      |
| LZTO-FN | 13.95              | 40.4                          | 42.23                        | 10.32              | 65.9                          | 95.09                        | $6.6 \times 10^{-11}$                                |
| LZTO-FA | 11.4               | 18.13                         | 25.54                        | 5.955              | 9.661                         | 25.97                        | $4.85 \times 10^{-10}$                               |

EIS was tested on the cells cycling for 400 cycles at 2 A g<sup>-1</sup> (Fig. S7a), and cycling at different current densities in Fig. 5d (Fig. S7b). For each curve, it is composed of a small intercept, two semicircles and a straight line. Figs. S7a-b (inset) are the equivalent circuit models.  $R_b$  represents the combined impedance between the electrolyte and cell components;  $C_{\text{sei}}$  and  $R_{\text{sei}}$  are the capacitance and the resistance of the SEI layer corresponding to the first semicircle;  $C_{\text{dl}}$  and  $R_{\text{ct}}$  are the double layer capacitance and charge transfer resistance corresponding to the second semicircle;  $W$  is Warburg impedance. Cycling for 400 cycles at 2 A g<sup>-1</sup>, the  $R_{\text{ct}}$  is 40.4 and 18.13  $\Omega$  for LZTO-FN and LZTO-FA (Table S9), respectively. After cycling for several cycles at different current densities in Fig. 5d, the  $R_{\text{ct}}$  is 65.9 and 9.661  $\Omega$  for LZTO-FN and LZTO-FA (Table S9), respectively. It can be seen that LZTO-FA with proper amount of OVs has smaller  $R_{\text{ct}}$  than that of LZTO-FN with excess OVs. Small  $R_{\text{ct}}$  benefits for the electrochemical performance of LZTO-FA.

The diffusion coefficients of Li<sup>+</sup> ions ( $D_{\text{Li}^+}$ ) in the two samples are estimated



based on the Warburg diffusion in low frequency (Fig. S7b) using the following equation [1]

$$D_{Li^+} = R^2 T^2 / (2A^2 n^4 F^4 C^2 \sigma^2) \quad (S1)$$

where  $R$  is the gas constant (8.314 J mol<sup>-1</sup> K<sup>-1</sup>);  $T$  is the room absolute temperature (298.5 K);  $A$  is the surface area of the electrode (1.13 cm<sup>2</sup> in this work);  $n$  is the number of electrons transferred in the half reaction for the redox couple;  $F$  is Faraday constant (96,485 C mol<sup>-1</sup>);  $C$  is the concentration of Li<sup>+</sup> ion in the compound, and can be calculated based on the following equation

$$C = \frac{3 \times 4}{6.022 \times 10^{23} \times V} \quad (S2)$$

$\sigma$  is the Warburg factor which obeys the following relationship:

$$Z_{re} = R_e + R_{ct} + \sigma \omega^{-1/2} \quad (S3)$$

The relationship between  $Z_{re}$  and  $\omega^{-1/2}$  is shown in Fig. S7c. Based on the Equations S1 and S3,  $D_{Li^+}$  of LZTO-FN and LZTO-FA can be obtained and the values are  $6.6 \times 10^{-11}$  and  $4.85 \times 10^{-10}$  cm<sup>2</sup> s<sup>-1</sup>, respectively. Compared with LZTO-FN electrode, LZTO-FA has higher  $D_{Li^+}$ , which is advantageous to its rate capability.

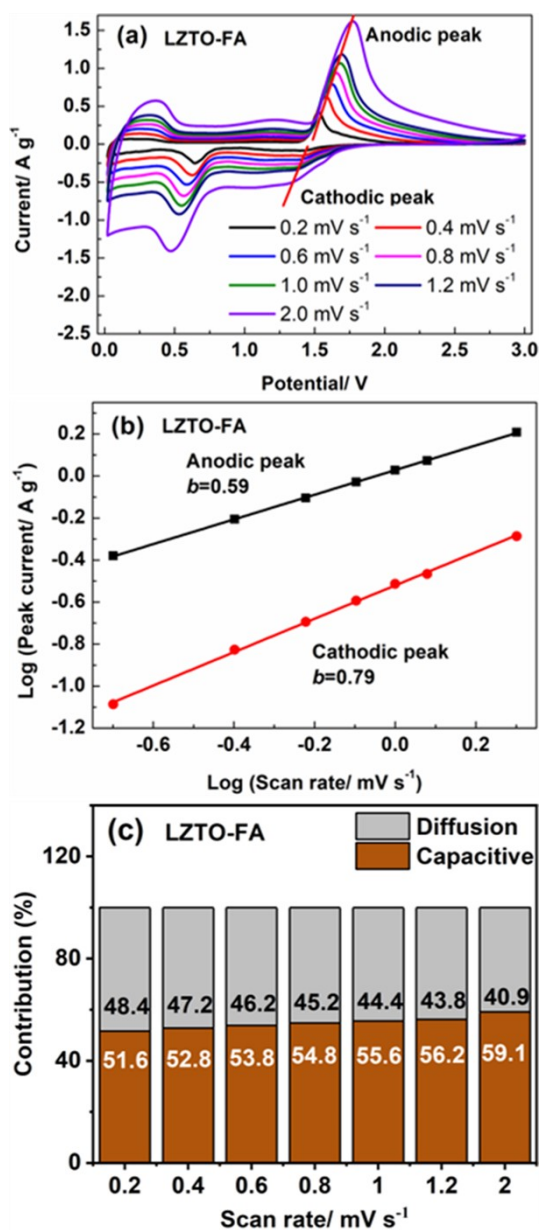

Fig. S8 (a) CV curves of LZTO-FA at different scan rates from 0.2 to 2.0 mV s<sup>-1</sup>, (b) corresponding log  $i$  versus log  $v$  plots at redox peaks (peak current:  $i$ , scan rate:  $v$ ) and (c) contribution of the pseudocapacitive behaviors of LZTO-FA at different scan rates.

To further understand the kinetic behaviors of Li-storage for LZTO-FA, the CV curves were recorded at different scan rates from 0.2 to 2.0 mV s<sup>-1</sup> as displayed in Fig. S8a. The peak intensities gradually increase with the increase of the scan rates. In general, the charge-storage type is composed of faradaic intercalation (ion diffusion)

and non-Faradaic (pseudocapacitive) behavior and can be determined by analyzing the relationship between scan rate ( $\nu$ ) and peak current ( $i$ ) based on the equations S4 and S5:

$$i = a\nu^b \quad (\text{S4})$$

$$\log i = b \times \log \nu + \log a \quad (\text{S5})$$

where  $a$  and  $b$  are adjustment parameters.  $b$  can be obtained by the slope of  $\log i$  vs.  $\log \nu$ . When  $b$  values are equal to 0.5 and 1.0, the electrochemical reaction can be controlled by ion diffusion and pseudocapacitance [49], respectively. The  $b$  values of the redox peaks for LZTO-FA vary between 0.5 and 1.0, indicating that the coexistence of both the diffusive and capacitive processes (Fig. S8b).

The contribution proportions of the pseudocapacitance ( $k_1\nu$ ) and intercalation ( $k_2\nu^{1/2}$ ) behaviors at different scan rates can be quantitatively calculated by the equation S6 [70]:

$$i = k_1\nu + k_2\nu^{1/2} \quad (\text{S6})$$

where  $k_1$  and  $k_2$  represent the contribution from the capacitance-controlled and diffusion-controlled processes, respectively. The capacitive contribution increases gradually with the increase of the scan rate from 0.2 to 2.0  $\text{mV s}^{-1}$ . It can be seen that the pseudocapacitive charge-storage has the obvious advantage in the whole capacity, indicating good rate capability.

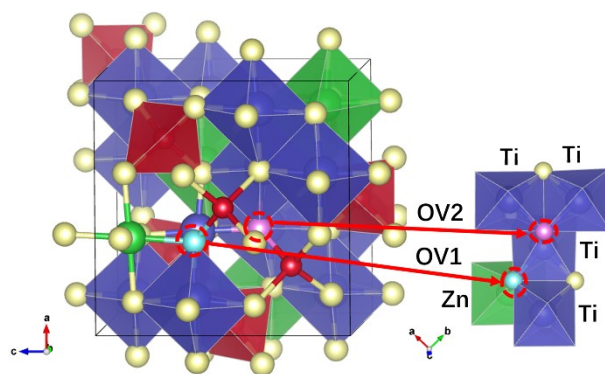

Fig. S9 Possible configurations of oxygen vacancies in  $P4_332$   $\text{Li}_2\text{ZnTi}_3\text{O}_8$ .

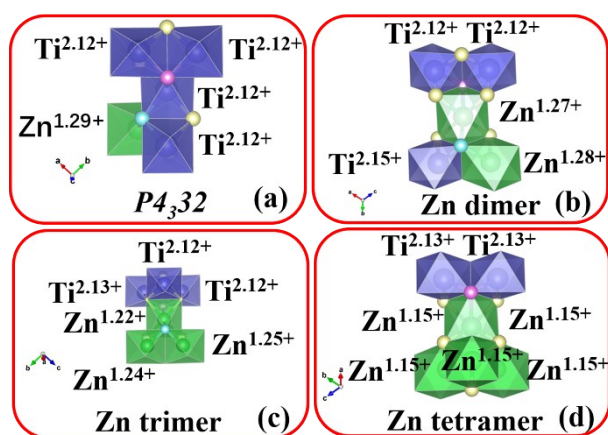

Fig. S10 Local atomic structures of (a)  $P4_332$  phase and (b-d) Zn aggregated supercells.

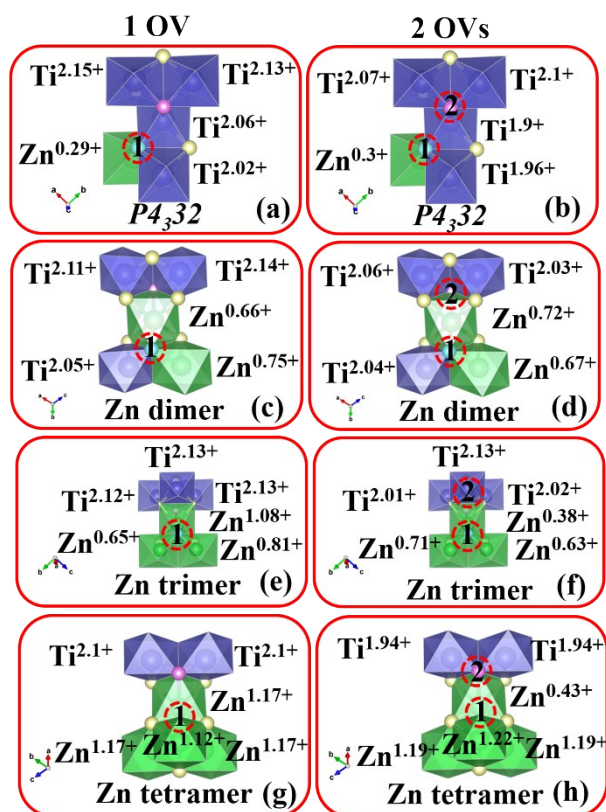

Fig. S11 Local atomic structures of the most energetically favorable OV<sub>s</sub> in Zn aggregated supercells.

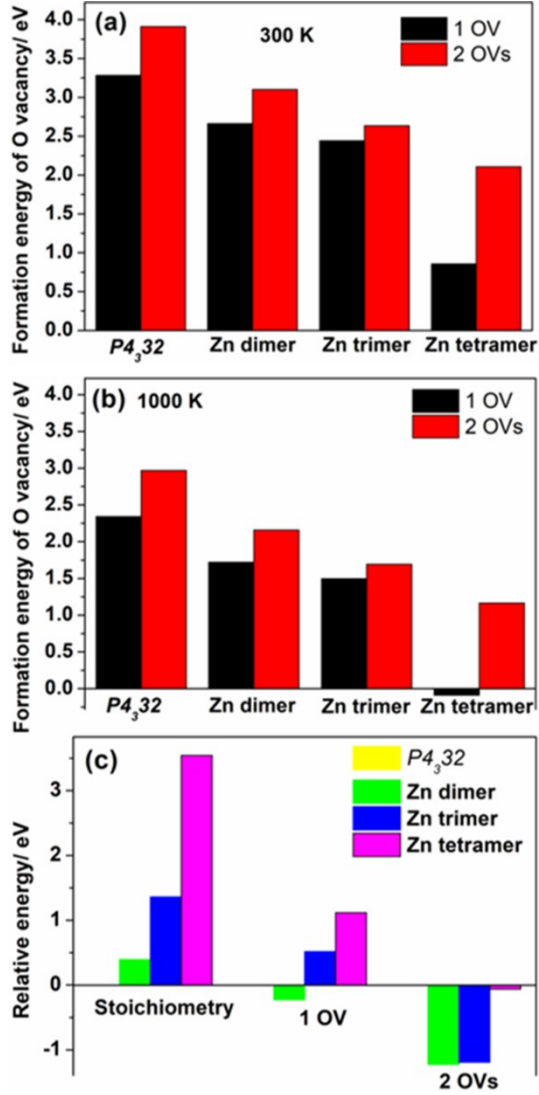

Fig. S12 Formation energies of one or two OVVs in  $P4_332$  and Zn aggregated supercells at (a) 300 K and (b) 1000 K. (b) Total energies of Zn aggregated supercells relative to the  $P4_332$  phase (Total energies of Zn/Ti ordered supercells are set to 0 eV).

Table S10 Equilibrium lattice parameters and cell volumes obtained by calculations.

| Samples          | $a$ (Å) | $b$ (Å) | $c$ (Å) | $V$ (Å <sup>3</sup> ) |
|------------------|---------|---------|---------|-----------------------|
| $P4_332$ phase   | 8.3310  | 8.3310  | 8.3310  | 578.2323              |
| LZTO with 1 OV   | 8.3281  | 8.3210  | 8.3584  | 579.2283              |
| LZTO with 2 OVVs | 8.3574  | 8.2987  | 8.3679  | 580.3714              |

Table S11 Intercalation potential and band gap.

| Samples                       | Intercalation potential (V) | Band gap (eV) |
|-------------------------------|-----------------------------|---------------|
| <i>P4<sub>3</sub>32</i> phase | 1.34                        | 3.2165        |
| LZTO with 1 OV                | 1.30                        | 1.2547        |
| LZTO with 2 OVs               | 1.38                        | 0.1989        |

### III. References

- [1] Z. Zhang, R. Xun, Z. Shen, L. Wang, S. Wang, Z. Meng, Synthesis of Nb-doped  $\text{Li}_2\text{ZnTi}_3\text{O}_8$  anode with long cycle life and applications in the  $\text{LiMn}_2\text{O}_4/\text{Li}_2\text{ZnTi}_3\text{O}_8$  full cell, *ACS Sustainable Chemistry & Engineering*, 8 (2020) 2763-2771.
- [2] G. Kresse, J. Hafner, Ab initio molecular dynamics for liquid metals, *Physical Review B*, 47 (1993) 558-561.
- [3] G. Kresse, J. Hafner, Ab initio molecular-dynamics simulation of the liquid-metal -amorphous-semiconductor transition in germanium, *Physical Review B*, 49 (1994) 14251-14269.
- [4] G. Kresse, J. Furthmüller, Efficiency of ab-initio total energy calculations for metals and semiconductors using a plane-wave basis set, *Computational Materials Science*, 6 (1996) 15-50.
- [5] G. Kresse, J. Furthmüller, Efficient iterative schemes for ab initio total-energy calculations using a plane-wave basis set, *Physical Review B*, 54 (1996) 11169-11186.
- [6] G. Kresse, D. Joubert, From ultrasoft pseudopotentials to the projector augmented-wave method, *Physical Review B*, 59 (1999) 1758-1775.

- [7] P. E. Blöchl, Projector augmented-wave method, *Physical Review B*, 50 (1994) 17953-17979.
- [8] J. P. Perdew, K. Burke, M. Ernzerhof, Generalized gradient approximation made simple, *Physical Review Letters*, 77 (1996) 3865-3868.
- [9] V. I. Anisimov, J. Zaanen, O. K. Andersen, Band theory and Mott insulators: Hubbard  $U$  instead of Stoner  $I$ , *Physical Review B*, 44 (1991) 943-954.
- [10] G. Henkelman, B.P. Uberuaga, H. Jonsson, A climbing image nudged elastic band method for finding saddle points and minimum energy paths, *Journal of Chemical Physics*, 113(2000) 9901-9904.
- [11] C. Chen, C. Ai, X. Liu, Ti(III) self-doped  $\text{Li}_2\text{ZnTi}_3\text{O}_8$  as a superior anode material for Li-ion batteries, *Electrochimica Acta*, 265 (2018) 448-454.
- [12] K. Liang, X. Huang, X. Hong, Y. Liao, Y. Ren, H. Wang, Sulfur and nitrogen-doped  $\text{Li}_4\text{Ti}_5\text{O}_{12}/\text{rGO}$  as an anode material for advanced sodium-ion batteries, *Journal of Alloys and Compounds*, 857 (2021) 158190-158198.
- [13] X. Deng, Z. Wei, C. Cui, Q. Liu, C. Wang, J. Ma, Oxygen-deficient anatase  $\text{TiO}_2@\text{C}$  nanospindles with pseudocapacitive contribution for enhancing lithium storage, *Journal of Materials Chemistry A*, 6 (2018) 4013-4022.
- [14] T.-F. Yi, L.-Y. Qiu, J. Mei, S.-Y. Qi, P. Cui, S.H. Luo, Y.-R. Zhu, Y. Xie, Y.-B. He, Porous spherical  $\text{NiO}@\text{NiMoO}_4@\text{PPy}$  nanoarchitectures as advanced electrochemical pseudocapacitor materials, *Science Bulletin*, 65 (2020) 546-556.
- [15] T.F. Yi, L.N. Shi, X. Han, F.F. Wang, Y.R. Zhu, Ying Xie, Approaching high-performance lithium storage materials by constructing hierarchical  $\text{CoNiO}_2@\text{CeO}_2$



- nanosheets, *Energy & Environmental Materials*, 4 (2021) 586-595.
- [16] Z. Yao, H. Yin, L. Zhou, G. Pan, Y. Wang, X. Xia, J. Wu, X. Wang, J. Tu,  $Ti^{3+}$  self-doped  $Li_4Ti_5O_{12}$  anchored on N-doped carbon nanofiber arrays for ultrafast lithium-ion storage, *Small*, 15 (2019) 1905296-1905302.
- [17] J. Lee, X. Cui, Facile preparation of  $Ti^{3+}$  self-doped  $TiO_2$  microspheres with lichi-like surface through selective etching, *Material Letters*, 175 (2016) 114-117.
- [18] M. Xing, J. Zhang, B. Qiu, B. Tian, M. Anpo, M. Che, A brown mesoporous  $TiO_{2-x}/MCF$  composite with an extremely high quantum yield of solar energy photocatalysis for  $H_2$  evolution, *Small*, 11 (2015) 1920-1929.
- [19] T.-F. Yi, J.-Z. Wu, J. Yuan, Y.-R. Zhu, P.-F. Wang, Rapid lithiation and delithiation property of V-doped  $Li_2ZnTi_3O_8$  as anode material for lithium-ion battery, *ACS Sustainable Chemistry & Engineering*, 3 (2015) 3062-3069.
- [20] A. Ziarati, A. Badieli, R. Luque, Black hollow  $TiO_2$  nanocubes: Advanced nanoarchitectures for efficient visible light photocatalytic applications, *Applied Catalysis B-Environmental*, 238 (2018) 177-183.
- [20] C. Chen, C. Ai, X. Liu, Y. He, S. Yang, Y. Wu, High performance  $Li_2ZnTi_3O_8@C$  anode material fabricated by a facile method without an additional carbon source, *Journal of Alloys and Compounds*, 698 (2017) 692-698.
- [22] Y. Ren, P. Lu, X. Huang, J. Ding, H. Wang, Enhanced electrochemical properties of  $Li_2ZnTi_3O_8/C$  nanocomposite synthesized with phenolic resin as carbon source, *Journal of Solid State Electrochemistry*, 21 (2017) 125-131.
- [23] A. I. Inamdar, A. T. A. Ahmed, H. S. Chavan, Y. Jo, S. Cho, J. Kim, S. M. Pawar,

- B. Hou, S. N. Cha, H. Kim, H. Im, Influence of operating temperature on  $\text{Li}_2\text{ZnTi}_3\text{O}_8$  anode performance and high-rate charging activity of Li-ion battery, *Ceramics International*, 44 (2018) 18625-18632.
- [24] Z. Li, H. Li, Y. Cui, Z. Du, Y. Ma, C. Ma, Z. Tang,  $\text{Li}_2\text{MoO}_4$  modified  $\text{Li}_2\text{ZnTi}_3\text{O}_8$  as a high property anode material for lithium ion battery, *Journal of Alloys and Compounds*, 692 (2017) 131-139.
- [25] Z. Meng, L. Wang, X. Li, G. Zhang, H. Li, Synthesis of high performance carbon-coated lithium zinc titanate via an EDTA-assisted route, *International Journal of Hydrogen Energy*, 42 (2017) 2177-2186.
- [26] Z. Meng, S. Wang, X. Chen, L. Wang, F. Wang, Synthesis high rate capability N-doped carbon coated on lithium zinc titanate via a surfactant-assisted solid-state, *RSC Advances*, 7 (2017) 54258-54265.
- [27] Z. Meng, S. Wang, L. Wang, H. Hou, Synthesis of high performance N-doped carbon coated  $\text{Li}_2\text{ZnTi}_3\text{O}_8$  via a NTA-assisted solid-state route, *Dalton Transactions*, 47 (2018) 2711-2718.
- [28] S. Wang, L. Wang, Z. Meng, B. Luo,  $\text{Li}_2\text{ZnTi}_3\text{O}_8$ /graphene nanocomposite as a high-performance anode material for lithium-ion batteries, *RSC Advances*, 8 (2018) 31628-31632.
- [29] S. Wang, L. Wang, Z. Meng, R. Xun, Design of a three-dimensional-network  $\text{Li}_2\text{ZnTi}_3\text{O}_8$  co-modified with graphene nanosheets and carbon nanotubes as a high performance anode material for lithium-ion batteries, *Journal of Alloys and Compounds*, 774 (2019) 581-585.

- [30] S. Wang, Y. Bi, L. Wang, Z. Meng, B. Luo, Mo-doped  $\text{Li}_2\text{ZnTi}_3\text{O}_8$ @graphene as a high performance anode material for lithium-ion batteries, *Electrochimica Acta*, 301 (2019) 319-324.
- [31] Z. Meng, S. Wang, H. Wang, L. Wang, S. Wang,  $\text{La}_2\text{O}_3$ -coated  $\text{Li}_2\text{ZnTi}_3\text{O}_8$ @C as a high performance anode for lithium-ion batteries, *RSC Advances*, 9 (2019) 20618-20623.
- [32] H. Yang, J. Park, C.S. Kim, Y.H. Xu, H.L. Zhu, Y.X. Qi, L. Yin, H. Li, N. Lun, Y.J. Bai, Uniform surface modification of  $\text{Li}_2\text{ZnTi}_3\text{O}_8$  by liquated  $\text{Na}_2\text{MoO}_4$  to boost electrochemical performance, *ACS Applied Materials & Interfaces*, 9 (2017) 43603-43613.
- [33] H. Tang, C. Chen, T. Liu, Z. Tang, Chitosan and chitosan oligosaccharide: Advanced carbon sources are used for preparation of N-doped carbon-coated  $\text{Li}_2\text{ZnTi}_3\text{O}_8$  anode material, *Journal of Electroanalytical Chemistry*, 858 (2020) 113789-113797.
- [34] Z. Shen, Z. Zhang, S. Wang, Z. Liu, L. Wang, Y. Bi, Z. Meng,  $\text{Mg}^{2+}$ - $\text{W}^{6+}$  co-doped  $\text{Li}_2\text{ZnTi}_3\text{O}_8$  anode with outstanding room, high and low temperature electrochemical performance for lithium-ion batteries, *Inorganic Chemistry Frontiers*, 6 (2019) 3288-3294.
- [35] H. Li, Z. Li, Y. Cui, C. Ma, Z. Tang, Long-cycled  $\text{Li}_2\text{ZnTi}_3\text{O}_8/\text{TiO}_2$  composite anode material synthesized via a one-pot co-precipitation method for lithium ion batteries, *New Journal of Chemistry*, 41 (2017) 975-981.
- [36] S. Yıldız, H. Şahan, In situ synthesis of reduced graphite oxide- $\text{Li}_2\text{ZnTi}_3\text{O}_8$

composite as a high rate anode material for lithium-ion batteries, *Journal of The Electrochemical Society*, 166 (2019) A2002-A2012.

[37] N. Firdous, N. Arshad, P. Norby, Synergic effect of niobium doping and carbon coating on the performance of a  $\text{Li}_2\text{ZnTi}_3\text{O}_8$  anode candidate for lithium ion batteries, *Energy & Fuels*, 34 (2020) 14968-14974.

[38] N. Firdous, N. Arshad, S.B. Simonsen, P. Kadirvelayutham, P. Norby, Advanced electrochemical investigations of niobium modified  $\text{Li}_2\text{ZnTi}_3\text{O}_8$  lithium ion battery anode materials, *Journal of Power Sources*, 462 (2020) 228186-228195.

[39] T. Lan, L. Chen, Y. Liu, W. Zhang, M. Wei, Nanocomposite  $\text{Li}_2\text{ZnTi}_3\text{O}_8/\text{C}$  with enhanced electrochemical performances for lithium-ion batteries, *Journal of Electroanalytical Chemistry*, 794 (2017) 120-125.

[40] H. Yang, X.-H. Wang, Y.-X. Qi, N. Lun, Y.-M. Cao, Y.-J. Bai, Improving the electrochemical performance of  $\text{Li}_2\text{ZnTi}_3\text{O}_8$  by surface KCl modification, *ACS Sustainable Chemistry & Engineering*, 5 (2017) 6099-6106.

[41] H. Yang, N. Lun, Y.-X. Qi, H.-L. Zhu, J.-R. Liu, J.-K. Feng, L.-l. Zhao, Y.-J. Bai,  $\text{Li}_2\text{ZnTi}_3\text{O}_8$  coated with uniform lithium magnesium silicate layer revealing enhanced rate capability as anode material for Li-ion battery, *Electrochimica Acta*, 315 (2019) 24-32.

[42] J.-L. Qin, H.-L. Zhu, N. Lun, Y.-X. Qi, Y.-J. Bai,  $\text{Li}_2\text{ZnTi}_3\text{O}_8/\text{C}$  anode with high initial Coulombic efficiency, long cyclic life and outstanding rate properties enabled by fulvic acid, *Carbon*, 163 (2020) 297-307.

[43] H. Yang, J. Park, C.-S. Kim, Y.-H. Xu, H.-L. Zhu, Y.-X. Qi, L.-W. Yin, H. Li,

N. Lun, Y.-J. Bai, Boosted electrochemical performance of  $\text{Li}_2\text{ZnTi}_3\text{O}_8$  enabled by ion-conductive  $\text{Li}_2\text{ZrO}_3$  concomitant with superficial Zr-doping, *Journal of Power Sources*, 379 (2018) 270-277.

[44] H. Yang, H.-L. Zhu, Y.-X. Qi, N. Lun, Y.-J. Bai, Optimizing the cycling life and high-rate performance of  $\text{Li}_2\text{ZnTi}_3\text{O}_8$  by forming thin uniform carbon coating derived from citric acid, *Journal of Materials Science*, 55 (2020) 15538-15550.

[45] X. Zeng, J. Peng, H. Zhu, Y. Gong, X. Huang, Cr-doped  $\text{Li}_2\text{ZnTi}_3\text{O}_8$  as a high performance anode material for lithium-ion batteries, *Frontiers in Chemistry*, 8 (2020) 600204-600210.

[46] H. Tang, T. Liu, Z. Tang, The stereo-microstructure of ZnO affects the lithium storage capacity of  $\text{Li}_2\text{ZnTi}_3\text{O}_8$  anode materials, *Dalton Transactions*, 48 (2019) 12303-12314.

[47] H. Tang, Y. Song, L. Zan, Y. Yue, D. Dou, Y. Song, M. Wang, X. Liu, T. Liu, Z. Tang, Characterization of lithium zinc titanate doped with metal ions as anode materials for lithium ion batteries, *Dalton Transactions*, 50 (2021) 3356-3368.

[48] Y. Li, T.-F. Yi, X. Li, X. Lai, J. Pan, P. Cui, Y.-R. Zhu, Y. Xie,  $\text{Li}_2\text{ZnTi}_3\text{O}_8@ \alpha\text{-Fe}_2\text{O}_3$  composite anode material for Li-ion batteries, *Ceramics International*, 47 (2021) 18732-18742.

[49] L. Qiu, X.-Q. Lai, F. Wang, J. Pan, Y.-R. Zhu, P. Cui, T.-F. Yi, Promoting the Li storage performances of  $\text{Li}_2\text{ZnTi}_3\text{O}_8@ \text{Na}_2\text{WO}_4$  composite anode for Li-ion battery, *Ceramics International*, 47 (2021) 19455-19463.

[50] Q. He, Z.G. Sun, X.W. Shi, W.W. Wu, J.P. Cheng, R.F. Zhuo, Z.Y. Zhang, J.

Wang, Electrochemical performance enhancement of nitrogen-doped TiO<sub>2</sub> for lithium-ion batteries investigated by a film electrode model, *Energy & fuels*, 35 (2021) 2717-2726.

[51] X.M. Lu, F.Y. Luo, Q.H. Tian, W. Zhang, Z.Y. Sui, J.Z. Chen, Anatase TiO<sub>2</sub> nanowires intertwined with CNT for conductive additive-free lithium-ion battery anodes, *Journal of Physics and Chemistry of Solids*, 153 (2021) 110037-110043.

[52] T. Partheeban, T. Kesavan, A. Jithin, S. Dharaneshwar, M. Sasidharan, Melamine-templated TiO<sub>2</sub> nanoparticles as anode with high capacity and cycling stability for lithium-ion batteries, *Journal of Solid State Electrochemistry*, 25 (2021) 919-926.

[53] Y. Wang, N. Li, C. Hou, B. He, J. Li, F. Dang, J. Wang, Y. Fan, Nanowires embedded porous TiO<sub>2</sub>@C nanocomposite anodes for enhanced stable lithium and sodium ion battery performance, *Ceramics International*, 46 (2020) 9119-9128.

[54] X. Shen, M. Chen, X. Hong, W. Wang, Z. Qiao, J. Chen, S. Fan, J. Yu, C. Tang, Synthesis and anodic performance of TiO<sub>2</sub>-carbonized PAN electrode for lithium ion batteries, *Chemical Physics*, 530 (2020) 110639-110643.

[55] Y. Zhang, M. Zhang, Y. Liu, H. Zhu, L. Wang, Y. Liu, M. Xue, B. Li, X. Tao, Oxygen vacancy regulated TiNb<sub>2</sub>O<sub>7</sub> compound with enhanced electrochemical performance used as anode material in Li-ion batteries, *Electrochimica Acta*, 330 (2020) 135299-135308.

[56] J. Luo, J. Peng, P. Zeng, Z. Wu, J. Li, W. Li, Y. Huang, B. Chang, X. Wang, TiNb<sub>2</sub>O<sub>7</sub> nano-particle decorated carbon cloth as flexible self-support anode material

in lithium-ion batteries, *Electrochimica Acta*, 332 (2020) 135469-135479.

[57] Ö. Budak, P. Srimuk, M. Aslan, H. Shim, L. Borchardt, V. Presser, Titanium niobium oxide  $Ti_2Nb_{10}O_{29}$ /carbon hybrid electrodes derived by mechanochemically synthesized carbide for high-performance lithium-ion batteries, *ChemSusChem*, 14 (2021) 398-407.

[58] C.-H. Lu, K.-C. Li, S. Balaji, P.S. Kumar, Agar-assisted sol-gel synthesis and electrochemical characterization of  $TiNb_2O_7$  anode materials for lithium-ion batteries, *Ceramics International*, 47 (2021) 18619-18624.

[59] R.F. Qian, C.F. Yang, D.W. Ma, K.M. Li, T. Feng, J.J. Feng, J. H. Pan, Robust lithium storage of block copolymer-templated mesoporous  $TiNb_2O_7$  and  $TiNb_2O_7@C$  anodes evaluated in half-cell and full-battery configurations, *Electrochimica Acta*, 379 (2021) 138179-138189.

[60] C.H. Wang, L. Huang, Y. Zhong, X.L. Tong, C.D. Gu, X.H. Xia, Lingjie Zhang, X.L. Wang, J.P. Tu,  $Ti_2Nb_{10}O_{29}$  anchored on *Aspergillus Oryzae* spore carbon skeleton for advanced lithium ion storage, *Sustainable Materials and Technologies*, 28 (2021) e00272.

[62] H.B. Ding, Z.H. Song, K. Feng, H.Z. Zhang, H.M. Zhang, X.F. Li, Controlled synthesis of pure-phase metastable tetragonal  $Nb_2O_5$  anode material for high-performance lithium batteries, *Journal of Solid State Chemistry*, 299 (2021) 122136-122143.

[63] N. Li, X.W. Lan, L.B. Wang, Y.J. Jiang, S.T. Guo, Y.Q. Li, X.L. Hu, Precisely tunable T- $Nb_2O_5$  nanotubes via atomic layer deposition for fast-charging lithium-ion

- batteries, ACS Applied Materials & Interfaces, 13 (2021) 16445-16453.
- [64] X.M. Zhang, J.Y. Wang, X.B. Wang, Y.B. Li, Y. Zhao, Z. Bakenov, G. Li, 3D ordered macroporous amorphous Nb<sub>2</sub>O<sub>5</sub> as anode material for high-performance sodium-ion batteries, Applied Surface Science, 567 (2021) 150862-150870.
- [65] Y. Lian, Y.J. Zheng, Y.Q. Bai, D.W. Wang, H.S. Yan, Z.F. Wang, J. Zhao, H.H. Zhang, Oxygen defected T-Nb<sub>2</sub>O<sub>5-x</sub> confined in necklace-like N-doped carbon fibers for Li<sup>+</sup>/Na<sup>+</sup> capacitor, Journal of Power Sources, 507 (2021) 230267-230276.
- [66] P.P. Jing, K.T. Liu, L. Soule, J. Wang, T.T. Li, B. Zhao, M.L. Liu, Engineering the architecture and oxygen deficiency of T-Nb<sub>2</sub>O<sub>5</sub>-carbon-graphene composite for high-rate lithium-ion batteries, Nano Energy, 89 (2021) 106398-106407.
- [67] T. Yang, Z.Z. Yang, X.F. Cheng, Y.H. Ding, Y.X. Fan, G.X. Liu, K. Zhang, S.Y. Jin, X.D. Liu, Z.P. Qiao, Three-dimensional hierarchical urchin-like Nb<sub>2</sub>O<sub>5</sub> microspheres wrapped with N-doped carbon: An advanced anode for lithium-ion batteries, Journal of Alloys and Compounds, 876 (2021) 160145-160154.
- [68] W. Liu, X. Zhang, C. Li, K. Wang, X. Sun, Y. Ma, Carbon-coated Li<sub>3</sub>VO<sub>4</sub> with optimized structure as high capacity anode material for lithium-ion capacitors, Chinese Chemical Letters, 31 (2020) 2225-2229.
- [69] N. Gautam, R. Muhammad, H. Raj, A. Sil, P. Mohanty, T.K. Mandal, Multimodal mesopore hierarchy in Li<sub>3</sub>VO<sub>4</sub> boosts electrochemical anode performance of lithium-ion batteries, Microporous and Mesoporous Materials, 290 (2019) 109669-109673.
- [70] Y. Wang, H.T. Shi, J.R. Niu, W. Mai, L.Y. Liu, Z.W. Xu, Self-healing



Sn<sub>4</sub>P<sub>3</sub>@hard carbon co-storage anode for sodium-ion batteries, Journal of Alloys  
Compounds, 851 (2021) 156746-156755.
